# Supplementary material
Source: publisher figshare collection journal article supplement (https://acs.figshare.com/ndownloader/files/4125895)
Supplement: Supplementary file 1 [file 4125895]

data_ea284

_audit_creation_method            SHELXL-97
_chemical_name_systematic
;
 ?
;
_chemical_name_common             ?
_chemical_melting_point           ?
_chemical_formula_moiety          ?
_chemical_formula_sum
 'C47 H59 Cl O P2 Ru'
_chemical_formula_weight          838.40

loop_
 _atom_type_symbol
 _atom_type_description
 _atom_type_scat_dispersion_real
 _atom_type_scat_dispersion_imag
 _atom_type_scat_source
 'C'  'C'   0.0033   0.0016
 'International Tables Vol C Tables 4.2.6.8 and 6.1.1.4'
 'H'  'H'   0.0000   0.0000
 'International Tables Vol C Tables 4.2.6.8 and 6.1.1.4'
 'O'  'O'   0.0106   0.0060
 'International Tables Vol C Tables 4.2.6.8 and 6.1.1.4'
 'P'  'P'   0.1023   0.0942
 'International Tables Vol C Tables 4.2.6.8 and 6.1.1.4'
 'Cl'  'Cl'   0.1484   0.1585
 'International Tables Vol C Tables 4.2.6.8 and 6.1.1.4'
 'Ru'  'Ru'  -1.2594   0.8363
 'International Tables Vol C Tables 4.2.6.8 and 6.1.1.4'

_symmetry_cell_setting            Triclinic
_symmetry_space_group_name_H-M    P-1

loop_
 _symmetry_equiv_pos_as_xyz
 'x, y, z'
 '-x, -y, -z'

_cell_length_a                    10.8723(3)
_cell_length_b                    13.9019(5)
_cell_length_c                    14.4817(4)
_cell_angle_alpha                 83.887(3)
_cell_angle_beta                  78.634(2)
_cell_angle_gamma                 86.384(3)
_cell_volume                      2131.73(11)
_cell_formula_units_Z             2
_cell_measurement_temperature     163(2)
_cell_measurement_reflns_used     ?
_cell_measurement_theta_min       ?
_cell_measurement_theta_max       ?

_exptl_crystal_description        prism
_exptl_crystal_colour             red
_exptl_crystal_size_max           0.24
_exptl_crystal_size_mid           0.18
_exptl_crystal_size_min           0.09
_exptl_crystal_density_meas       ?
_exptl_crystal_density_diffrn     1.306
_exptl_crystal_density_method     'not measured'
_exptl_crystal_F_000              880
_exptl_absorpt_coefficient_mu     0.539
_exptl_absorpt_correction_type    none
_exptl_absorpt_correction_T_min   ?
_exptl_absorpt_correction_T_max   ?
_exptl_absorpt_process_details    ?

_exptl_special_details
;
 ?
;

_diffrn_ambient_temperature       163(2)
_diffrn_radiation_wavelength      0.71073
_diffrn_radiation_type            MoK\a
_diffrn_radiation_source          'fine-focus sealed tube'
_diffrn_radiation_monochromator   graphite
_diffrn_measurement_device_type   'CCD Saphire 3 Xcalibur'
_diffrn_measurement_method        'omega scan'
_diffrn_detector_area_resol_mean  19.64
_diffrn_standards_number          ?
_diffrn_standards_interval_count  ?
_diffrn_standards_interval_time   ?
_diffrn_standards_decay_%         ?
_diffrn_reflns_number             15463
_diffrn_reflns_av_R_equivalents   0.0254
_diffrn_reflns_av_sigmaI/netI     0.0725
_diffrn_reflns_limit_h_min        -13
_diffrn_reflns_limit_h_max        11
_diffrn_reflns_limit_k_min        -17
_diffrn_reflns_limit_k_max        16
_diffrn_reflns_limit_l_min        -18
_diffrn_reflns_limit_l_max        12
_diffrn_reflns_theta_min          2.61
_diffrn_reflns_theta_max          27.00
_reflns_number_total              9157
_reflns_number_gt                 6287
_reflns_threshold_expression      >2sigma(I)

_computing_data_collection
'CrysAlis CCD, Oxford Diffraction Ltd.,Version 1.171.26'
_computing_cell_refinement
'CrysAlis RED, Oxford Diffraction Ltd.,Version 1.171.26'
_computing_data_reduction
'CrysAlis RED, Oxford Diffraction Ltd.,Version 1.171.26'

_computing_structure_solution     'SIR-97_(Altomare & al., 1998)'
_computing_structure_refinement   'SHELXL-97 (Sheldrick, 1997)'
_computing_molecular_graphics     'PLATON_(Spek, 1998)'
_computing_publication_material   'SHELXL-97 (Sheldrick, 1997)'

_refine_special_details
;
 Refinement of F^2^ against ALL reflections.  The weighted R-factor wR and
 goodness of fit S are based on F^2^, conventional R-factors R are based
 on F, with F set to zero for negative F^2^. The threshold expression of
 F^2^ > 2sigma(F^2^) is used only for calculating R-factors(gt) etc. and is
 not relevant to the choice of reflections for refinement.  R-factors based
 on F^2^ are statistically about twice as large as those based on F, and R-
 factors based on ALL data will be even larger.
;

_refine_ls_structure_factor_coef  Fsqd
_refine_ls_matrix_type            full
_refine_ls_weighting_scheme       calc
_refine_ls_weighting_details
 'calc w=1/[\s^2^(Fo^2^)+(0.0516P)^2^+0.0000P] where P=(Fo^2^+2Fc^2^)/3'
_atom_sites_solution_primary      direct
_atom_sites_solution_secondary    difmap
_atom_sites_solution_hydrogens    geom
_refine_ls_hydrogen_treatment     constr
_refine_ls_extinction_method      SHELXL
_refine_ls_extinction_coef        0.0026(4)
_refine_ls_extinction_expression
 'Fc^*^=kFc[1+0.001xFc^2^\l^3^/sin(2\q)]^-1/4^'
_refine_ls_number_reflns          9157
_refine_ls_number_parameters      470
_refine_ls_number_restraints      0
_refine_ls_R_factor_all           0.0685
_refine_ls_R_factor_gt            0.0409
_refine_ls_wR_factor_ref          0.0984
_refine_ls_wR_factor_gt           0.0866
_refine_ls_goodness_of_fit_ref    0.906
_refine_ls_restrained_S_all       0.906
_refine_ls_shift/su_max           0.001
_refine_ls_shift/su_mean          0.000

loop_
 _atom_site_label
 _atom_site_type_symbol
 _atom_site_fract_x
 _atom_site_fract_y
 _atom_site_fract_z
 _atom_site_U_iso_or_equiv
 _atom_site_adp_type
 _atom_site_occupancy
 _atom_site_symmetry_multiplicity
 _atom_site_calc_flag
 _atom_site_refinement_flags
 _atom_site_disorder_assembly
 _atom_site_disorder_group
Ru1 Ru -0.26470(2) 0.478009(19) 0.245108(16) 0.03061(9) Uani 1 1 d . . .
Cl1 Cl -0.26106(7) 0.56017(6) 0.08803(6) 0.0449(2) Uani 1 1 d . . .
P1 P -0.11602(7) 0.58967(6) 0.26816(6) 0.0351(2) Uani 1 1 d . . .
P2 P -0.44419(7) 0.39460(7) 0.22609(6) 0.0452(2) Uani 1 1 d . . .
O1 O -0.2791(2) 0.40118(19) 0.44288(16) 0.0526(6) Uani 1 1 d . . .
C1 C -0.1386(2) 0.3755(2) 0.20097(19) 0.0309(7) Uani 1 1 d . . .
H1 H -0.1020 0.3878 0.1359 0.037 Uiso 1 1 calc R . .
C2 C -0.0922(2) 0.2932(2) 0.2401(2) 0.0324(7) Uani 1 1 d . . .
H2 H -0.1281 0.2743 0.3043 0.039 Uiso 1 1 calc R . .
C3 C 0.0084(2) 0.2293(2) 0.19426(19) 0.0287(6) Uani 1 1 d . . .
C4 C 0.0852(3) 0.2567(2) 0.10496(19) 0.0347(7) Uani 1 1 d . . .
H4 H 0.0667 0.3158 0.0700 0.042 Uiso 1 1 calc R . .
C5 C 0.1847(3) 0.1989(2) 0.0696(2) 0.0371(8) Uani 1 1 d . . .
H5 H 0.2351 0.2186 0.0100 0.045 Uiso 1 1 calc R . .
C6 C 0.2157(3) 0.1104(2) 0.1185(2) 0.0336(7) Uani 1 1 d . . .
C7 C 0.3300(3) 0.0561(3) 0.0885(2) 0.0443(8) Uani 1 1 d . . .
H7 H 0.3824 0.0753 0.0297 0.053 Uiso 1 1 calc R . .
C8 C 0.3641(3) -0.0213(3) 0.1421(2) 0.0495(9) Uani 1 1 d . . .
H8 H 0.4438 -0.0527 0.1228 0.059 Uiso 1 1 calc R . .
C9 C 0.2851(3) -0.0583(3) 0.2271(2) 0.0429(8) Uani 1 1 d . . .
C10 C 0.3284(3) -0.1332(3) 0.2884(3) 0.0541(10) Uani 1 1 d . . .
H10 H 0.4081 -0.1647 0.2690 0.065 Uiso 1 1 calc R . .
C11 C 0.2590(3) -0.1607(3) 0.3736(3) 0.0534(10) Uani 1 1 d . . .
H11 H 0.2952 -0.2034 0.4176 0.064 Uiso 1 1 calc R . .
C12 C 0.1322(3) -0.1267(2) 0.3985(2) 0.0416(8) Uani 1 1 d . . .
C13 C 0.0591(4) -0.1546(3) 0.4888(2) 0.0499(9) Uani 1 1 d . . .
H13 H 0.0965 -0.1951 0.5337 0.060 Uiso 1 1 calc R . .
C14 C -0.0620(3) -0.1248(2) 0.5120(2) 0.0463(8) Uani 1 1 d . . .
H14 H -0.1056 -0.1360 0.5755 0.056 Uiso 1 1 calc R . .
C15 C -0.1248(3) -0.0769(2) 0.4422(2) 0.0381(7) Uani 1 1 d . . .
C16 C -0.2573(3) -0.0553(3) 0.4655(2) 0.0469(8) Uani 1 1 d . . .
H16 H -0.2993 -0.0657 0.5295 0.056 Uiso 1 1 calc R . .
C17 C -0.3236(3) -0.0208(3) 0.3993(2) 0.0472(9) Uani 1 1 d . . .
H17 H -0.4103 -0.0035 0.4174 0.057 Uiso 1 1 calc R . .
C18 C -0.2649(3) -0.0102(2) 0.3023(2) 0.0376(7) Uani 1 1 d . . .
C19 C -0.3370(3) 0.0148(3) 0.2313(3) 0.0476(9) Uani 1 1 d . . .
H19 H -0.4241 0.0306 0.2493 0.057 Uiso 1 1 calc R . .
C20 C -0.2848(3) 0.0166(3) 0.1384(2) 0.0481(9) Uani 1 1 d . . .
H20 H -0.3347 0.0349 0.0919 0.058 Uiso 1 1 calc R . .
C21 C -0.1570(3) -0.0085(3) 0.1108(2) 0.0423(8) Uani 1 1 d . . .
H21 H -0.1211 -0.0102 0.0456 0.051 Uiso 1 1 calc R . .
C22 C -0.0835(3) -0.0308(2) 0.1779(2) 0.0339(7) Uani 1 1 d . . .
H22 H 0.0030 -0.0477 0.1581 0.041 Uiso 1 1 calc R . .
C23 C -0.1331(3) -0.0294(2) 0.2752(2) 0.0317(7) Uani 1 1 d . . .
C24 C -0.0586(3) -0.0540(2) 0.3494(2) 0.0322(7) Uani 1 1 d . . .
C25 C 0.0776(3) -0.0640(2) 0.3317(2) 0.0332(7) Uani 1 1 d . . .
C26 C 0.1625(3) -0.0156(2) 0.2531(2) 0.0342(7) Uani 1 1 d . . .
C27 C 0.1349(2) 0.0768(2) 0.20421(19) 0.0288(6) Uani 1 1 d . . .
C28 C 0.0349(2) 0.1408(2) 0.24009(19) 0.0283(6) Uani 1 1 d . . .
H28 H -0.0169 0.1216 0.2992 0.034 Uiso 1 1 calc R . .
C29 C -0.2752(3) 0.4283(3) 0.3690(3) 0.0428(8) Uani 1 1 d . . .
C30 C -0.2073(3) 0.6987(2) 0.3132(2) 0.0473(9) Uani 1 1 d . . .
H30 H -0.1459 0.7475 0.3183 0.057 Uiso 1 1 calc R . .
C31 C -0.2897(3) 0.7441(3) 0.2442(3) 0.0641(11) Uani 1 1 d . . .
H31A H -0.2371 0.7592 0.1817 0.096 Uiso 1 1 calc R . .
H31B H -0.3318 0.8037 0.2674 0.096 Uiso 1 1 calc R . .
H31C H -0.3527 0.6985 0.2395 0.096 Uiso 1 1 calc R . .
C32 C -0.2868(4) 0.6753(3) 0.4121(3) 0.0758(13) Uani 1 1 d . . .
H32A H -0.2324 0.6471 0.4554 0.114 Uiso 1 1 calc R . .
H32B H -0.3498 0.6290 0.4089 0.114 Uiso 1 1 calc R . .
H32C H -0.3290 0.7349 0.4353 0.114 Uiso 1 1 calc R . .
C33 C -0.0109(3) 0.6398(3) 0.1593(2) 0.0462(8) Uani 1 1 d . . .
H33 H -0.0687 0.6647 0.1154 0.055 Uiso 1 1 calc R . .
C34 C 0.0641(4) 0.7264(3) 0.1663(3) 0.0691(12) Uani 1 1 d . . .
H34A H 0.0084 0.7756 0.1989 0.104 Uiso 1 1 calc R . .
H34B H 0.1020 0.7538 0.1026 0.104 Uiso 1 1 calc R . .
H34C H 0.1305 0.7057 0.2020 0.104 Uiso 1 1 calc R . .
C35 C 0.0729(4) 0.5640(3) 0.1080(3) 0.0741(13) Uani 1 1 d . . .
H35A H 0.0232 0.5089 0.1032 0.111 Uiso 1 1 calc R . .
H35B H 0.1396 0.5420 0.1430 0.111 Uiso 1 1 calc R . .
H35C H 0.1104 0.5917 0.0443 0.111 Uiso 1 1 calc R . .
C36 C -0.0240(3) 0.5499(3) 0.3619(2) 0.0440(8) Uani 1 1 d . . .
H36 H -0.0871 0.5276 0.4190 0.053 Uiso 1 1 calc R . .
C37 C 0.0470(4) 0.6286(3) 0.3931(3) 0.0795(14) Uani 1 1 d . . .
H37A H -0.0104 0.6843 0.4082 0.119 Uiso 1 1 calc R . .
H37B H 0.1163 0.6488 0.3418 0.119 Uiso 1 1 calc R . .
H37C H 0.0806 0.6029 0.4492 0.119 Uiso 1 1 calc R . .
C38 C 0.0627(3) 0.4631(3) 0.3397(3) 0.0668(12) Uani 1 1 d . . .
H38A H 0.0168 0.4134 0.3192 0.100 Uiso 1 1 calc R . .
H38B H 0.0947 0.4370 0.3964 0.100 Uiso 1 1 calc R . .
H38C H 0.1332 0.4825 0.2890 0.100 Uiso 1 1 calc R . .
C39 C -0.4927(4) 0.2866(5) 0.3069(4) 0.160(4) Uani 1 1 d . . .
H39 H -0.4621 0.2429 0.2558 0.192 Uiso 1 1 calc R . .
C40 C -0.4235(4) 0.2373(3) 0.3637(4) 0.0889(16) Uani 1 1 d . . .
H40A H -0.3380 0.2608 0.3487 0.133 Uiso 1 1 calc R . .
H40B H -0.4207 0.1683 0.3545 0.133 Uiso 1 1 calc R . .
H40C H -0.4607 0.2466 0.4297 0.133 Uiso 1 1 calc R . .
C41 C -0.6289(4) 0.2563(4) 0.3169(3) 0.1009(19) Uani 1 1 d . . .
H41A H -0.6686 0.2949 0.2693 0.151 Uiso 1 1 calc R . .
H41B H -0.6758 0.2673 0.3803 0.151 Uiso 1 1 calc R . .
H41C H -0.6289 0.1875 0.3077 0.151 Uiso 1 1 calc R . .
C42 C -0.4440(3) 0.3651(3) 0.1050(2) 0.0505(9) Uani 1 1 d . . .
H42 H -0.4243 0.4264 0.0632 0.061 Uiso 1 1 calc R . .
C43 C -0.3404(4) 0.2925(4) 0.0715(3) 0.0835(15) Uani 1 1 d . . .
H43A H -0.2606 0.3135 0.0825 0.125 Uiso 1 1 calc R . .
H43B H -0.3345 0.2877 0.0037 0.125 Uiso 1 1 calc R . .
H43C H -0.3588 0.2291 0.1065 0.125 Uiso 1 1 calc R . .
C44 C -0.5689(4) 0.3342(4) 0.0862(3) 0.0860(16) Uani 1 1 d . . .
H44A H -0.6358 0.3817 0.1081 0.129 Uiso 1 1 calc R . .
H44B H -0.5885 0.2705 0.1202 0.129 Uiso 1 1 calc R . .
H44C H -0.5621 0.3304 0.0182 0.129 Uiso 1 1 calc R . .
C45 C -0.5812(3) 0.4806(4) 0.2525(3) 0.0686(13) Uani 1 1 d . . .
H45 H -0.6587 0.4445 0.2553 0.082 Uiso 1 1 calc R . .
C46 C -0.5815(3) 0.5658(4) 0.1788(3) 0.0852(15) Uani 1 1 d . . .
H46A H -0.5791 0.5423 0.1169 0.128 Uiso 1 1 calc R . .
H46B H -0.5078 0.6038 0.1759 0.128 Uiso 1 1 calc R . .
H46C H -0.6580 0.6065 0.1955 0.128 Uiso 1 1 calc R . .
C47 C -0.5873(4) 0.5159(5) 0.3501(3) 0.128(3) Uani 1 1 d . . .
H47A H -0.5887 0.4600 0.3976 0.193 Uiso 1 1 calc R . .
H47B H -0.6637 0.5569 0.3663 0.193 Uiso 1 1 calc R . .
H47C H -0.5135 0.5534 0.3489 0.193 Uiso 1 1 calc R . .

loop_
 _atom_site_aniso_label
 _atom_site_aniso_U_11
 _atom_site_aniso_U_22
 _atom_site_aniso_U_33
 _atom_site_aniso_U_23
 _atom_site_aniso_U_13
 _atom_site_aniso_U_12
Ru1 0.03009(14) 0.03053(16) 0.03043(14) 0.00229(10) -0.00668(9) -0.00126(10)
Cl1 0.0452(4) 0.0450(5) 0.0433(5) 0.0088(4) -0.0115(4) -0.0050(4)
P1 0.0355(4) 0.0302(5) 0.0396(5) -0.0056(4) -0.0057(3) -0.0024(4)
P2 0.0354(4) 0.0595(7) 0.0394(5) 0.0170(4) -0.0110(4) -0.0176(4)
O1 0.0667(15) 0.0609(18) 0.0295(13) -0.0031(12) -0.0051(11) -0.0119(13)
C1 0.0319(15) 0.0353(19) 0.0256(15) -0.0021(13) -0.0045(12) -0.0059(13)
C2 0.0349(16) 0.0320(18) 0.0277(15) 0.0034(13) -0.0025(12) -0.0033(13)
C3 0.0292(14) 0.0303(18) 0.0279(15) -0.0008(13) -0.0084(12) -0.0061(12)
C4 0.0381(16) 0.0350(19) 0.0304(16) 0.0021(14) -0.0068(13) -0.0045(14)
C5 0.0365(17) 0.048(2) 0.0257(16) -0.0025(14) 0.0005(13) -0.0147(15)
C6 0.0303(15) 0.040(2) 0.0334(17) -0.0111(14) -0.0072(13) -0.0052(14)
C7 0.0353(17) 0.057(3) 0.0396(19) -0.0144(17) 0.0005(14) -0.0033(16)
C8 0.0320(17) 0.056(3) 0.060(2) -0.019(2) -0.0057(16) 0.0082(17)
C9 0.0384(18) 0.042(2) 0.052(2) -0.0124(17) -0.0154(15) 0.0079(16)
C10 0.044(2) 0.049(3) 0.073(3) -0.011(2) -0.0208(19) 0.0139(18)
C11 0.061(2) 0.044(2) 0.062(2) -0.0029(19) -0.034(2) 0.0090(19)
C12 0.057(2) 0.0272(19) 0.047(2) -0.0080(15) -0.0236(16) 0.0005(16)
C13 0.080(3) 0.037(2) 0.040(2) 0.0048(16) -0.0299(19) -0.0087(19)
C14 0.075(2) 0.034(2) 0.0314(18) -0.0018(15) -0.0108(17) -0.0127(18)
C15 0.057(2) 0.0245(18) 0.0339(17) -0.0030(14) -0.0077(15) -0.0107(15)
C16 0.057(2) 0.037(2) 0.0411(19) -0.0007(16) 0.0062(16) -0.0156(16)
C17 0.0438(19) 0.038(2) 0.055(2) -0.0036(17) 0.0024(16) -0.0059(16)
C18 0.0404(17) 0.0260(18) 0.0465(19) -0.0035(15) -0.0069(15) -0.0070(14)
C19 0.0346(17) 0.040(2) 0.069(2) -0.0022(18) -0.0146(17) -0.0029(15)
C20 0.050(2) 0.046(2) 0.054(2) -0.0005(18) -0.0262(17) -0.0054(17)
C21 0.0488(19) 0.044(2) 0.0378(18) -0.0043(15) -0.0140(15) -0.0097(16)
C22 0.0356(16) 0.0308(18) 0.0377(17) -0.0048(14) -0.0101(13) -0.0066(13)
C23 0.0378(16) 0.0199(16) 0.0381(17) 0.0005(13) -0.0093(13) -0.0060(13)
C24 0.0446(17) 0.0199(16) 0.0328(16) -0.0018(13) -0.0089(13) -0.0038(13)
C25 0.0434(17) 0.0254(17) 0.0346(17) -0.0071(13) -0.0149(14) 0.0003(14)
C26 0.0365(17) 0.0333(19) 0.0363(17) -0.0102(14) -0.0130(13) 0.0011(14)
C27 0.0267(14) 0.0328(18) 0.0294(15) -0.0073(13) -0.0080(12) -0.0053(13)
C28 0.0285(14) 0.0307(18) 0.0254(15) -0.0019(13) -0.0037(11) -0.0061(12)
C29 0.0390(18) 0.031(2) 0.061(2) -0.0114(17) -0.0119(16) -0.0022(15)
C30 0.0485(19) 0.0256(19) 0.067(2) -0.0113(17) -0.0056(17) 0.0011(15)
C31 0.057(2) 0.042(2) 0.093(3) -0.014(2) -0.014(2) 0.0126(19)
C32 0.086(3) 0.058(3) 0.073(3) -0.019(2) 0.013(2) 0.009(2)
C33 0.0423(18) 0.043(2) 0.052(2) -0.0032(17) -0.0053(15) -0.0081(16)
C34 0.068(2) 0.040(2) 0.088(3) -0.011(2) 0.016(2) -0.014(2)
C35 0.077(3) 0.063(3) 0.074(3) -0.033(2) 0.029(2) -0.034(2)
C36 0.0471(19) 0.045(2) 0.0448(19) -0.0112(16) -0.0160(15) -0.0059(16)
C37 0.099(3) 0.063(3) 0.095(3) -0.009(3) -0.057(3) -0.020(3)
C38 0.059(2) 0.073(3) 0.082(3) -0.027(2) -0.045(2) 0.021(2)
C39 0.096(4) 0.201(7) 0.183(6) 0.164(6) -0.090(4) -0.110(4)
C40 0.064(3) 0.056(3) 0.135(4) 0.038(3) -0.012(3) -0.013(2)
C41 0.075(3) 0.131(5) 0.093(3) 0.065(3) -0.028(2) -0.065(3)
C42 0.050(2) 0.055(3) 0.053(2) 0.0030(18) -0.0244(17) -0.0180(18)
C43 0.093(3) 0.082(4) 0.094(3) -0.032(3) -0.049(3) 0.001(3)
C44 0.077(3) 0.117(4) 0.077(3) 0.016(3) -0.045(2) -0.049(3)
C45 0.0293(18) 0.117(4) 0.055(2) 0.002(2) -0.0009(16) -0.004(2)
C46 0.043(2) 0.097(4) 0.109(4) 0.000(3) -0.010(2) 0.016(2)
C47 0.053(3) 0.254(9) 0.080(4) -0.060(4) -0.004(2) 0.025(4)

_geom_special_details
;
 All esds (except the esd in the dihedral angle between two l.s. planes)
 are estimated using the full covariance matrix.  The cell esds are taken
 into account individually in the estimation of esds in distances, angles
 and torsion angles; correlations between esds in cell parameters are only
 used when they are defined by crystal symmetry.  An approximate (isotropic)
 treatment of cell esds is used for estimating esds involving l.s. planes.
;

loop_
 _geom_bond_atom_site_label_1
 _geom_bond_atom_site_label_2
 _geom_bond_distance
 _geom_bond_site_symmetry_2
 _geom_bond_publ_flag
Ru1 C29 1.837(4) . ?
Ru1 C1 1.981(3) . ?
Ru1 P1 2.4028(9) . ?
Ru1 P2 2.4071(9) . ?
Ru1 Cl1 2.4285(8) . ?
P1 C33 1.853(3) . ?
P1 C36 1.858(3) . ?
P1 C30 1.863(3) . ?
P2 C39 1.840(4) . ?
P2 C42 1.842(3) . ?
P2 C45 1.856(4) . ?
O1 C29 1.090(4) . ?
C1 C2 1.336(4) . ?
C1 H1 0.9500 . ?
C2 C3 1.464(4) . ?
C2 H2 0.9500 . ?
C3 C28 1.376(4) . ?
C3 C4 1.423(4) . ?
C4 C5 1.357(4) . ?
C4 H4 0.9500 . ?
C5 C6 1.409(4) . ?
C5 H5 0.9500 . ?
C6 C27 1.424(4) . ?
C6 C7 1.428(4) . ?
C7 C8 1.335(5) . ?
C7 H7 0.9500 . ?
C8 C9 1.422(5) . ?
C8 H8 0.9500 . ?
C9 C10 1.415(5) . ?
C9 C26 1.421(4) . ?
C10 C11 1.344(5) . ?
C10 H10 0.9500 . ?
C11 C12 1.419(4) . ?
C11 H11 0.9500 . ?
C12 C13 1.419(5) . ?
C12 C25 1.424(4) . ?
C13 C14 1.343(4) . ?
C13 H13 0.9500 . ?
C14 C15 1.416(4) . ?
C14 H14 0.9500 . ?
C15 C24 1.407(4) . ?
C15 C16 1.433(4) . ?
C16 C17 1.341(4) . ?
C16 H16 0.9500 . ?
C17 C18 1.421(4) . ?
C17 H17 0.9500 . ?
C18 C19 1.414(4) . ?
C18 C23 1.425(4) . ?
C19 C20 1.352(5) . ?
C19 H19 0.9500 . ?
C20 C21 1.400(4) . ?
C20 H20 0.9500 . ?
C21 C22 1.375(4) . ?
C21 H21 0.9500 . ?
C22 C23 1.407(4) . ?
C22 H22 0.9500 . ?
C23 C24 1.470(4) . ?
C24 C25 1.452(4) . ?
C25 C26 1.450(4) . ?
C26 C27 1.442(4) . ?
C27 C28 1.413(4) . ?
C28 H28 0.9500 . ?
C30 C31 1.531(4) . ?
C30 C32 1.534(5) . ?
C30 H30 1.0000 . ?
C31 H31A 0.9800 . ?
C31 H31B 0.9800 . ?
C31 H31C 0.9800 . ?
C32 H32A 0.9800 . ?
C32 H32B 0.9800 . ?
C32 H32C 0.9800 . ?
C33 C35 1.508(5) . ?
C33 C34 1.519(5) . ?
C33 H33 1.0000 . ?
C34 H34A 0.9800 . ?
C34 H34B 0.9800 . ?
C34 H34C 0.9800 . ?
C35 H35A 0.9800 . ?
C35 H35B 0.9800 . ?
C35 H35C 0.9800 . ?
C36 C38 1.506(4) . ?
C36 C37 1.532(5) . ?
C36 H36 1.0000 . ?
C37 H37A 0.9800 . ?
C37 H37B 0.9800 . ?
C37 H37C 0.9800 . ?
C38 H38A 0.9800 . ?
C38 H38B 0.9800 . ?
C38 H38C 0.9800 . ?
C39 C40 1.330(5) . ?
C39 C41 1.540(5) . ?
C39 H39 1.0000 . ?
C40 H40A 0.9800 . ?
C40 H40B 0.9800 . ?
C40 H40C 0.9800 . ?
C41 H41A 0.9800 . ?
C41 H41B 0.9800 . ?
C41 H41C 0.9800 . ?
C42 C43 1.506(5) . ?
C42 C44 1.532(5) . ?
C42 H42 1.0000 . ?
C43 H43A 0.9800 . ?
C43 H43B 0.9800 . ?
C43 H43C 0.9800 . ?
C44 H44A 0.9800 . ?
C44 H44B 0.9800 . ?
C44 H44C 0.9800 . ?
C45 C46 1.508(6) . ?
C45 C47 1.532(6) . ?
C45 H45 1.0000 . ?
C46 H46A 0.9800 . ?
C46 H46B 0.9800 . ?
C46 H46C 0.9800 . ?
C47 H47A 0.9800 . ?
C47 H47B 0.9800 . ?
C47 H47C 0.9800 . ?

loop_
 _geom_angle_atom_site_label_1
 _geom_angle_atom_site_label_2
 _geom_angle_atom_site_label_3
 _geom_angle
 _geom_angle_site_symmetry_1
 _geom_angle_site_symmetry_3
 _geom_angle_publ_flag
C29 Ru1 C1 91.48(13) . . ?
C29 Ru1 P1 88.76(10) . . ?
C1 Ru1 P1 95.91(9) . . ?
C29 Ru1 P2 93.38(10) . . ?
C1 Ru1 P2 95.78(9) . . ?
P1 Ru1 P2 168.06(3) . . ?
C29 Ru1 Cl1 173.69(10) . . ?
C1 Ru1 Cl1 94.49(8) . . ?
P1 Ru1 Cl1 88.62(3) . . ?
P2 Ru1 Cl1 88.02(3) . . ?
C33 P1 C36 110.21(15) . . ?
C33 P1 C30 103.24(16) . . ?
C36 P1 C30 102.89(15) . . ?
C33 P1 Ru1 115.59(11) . . ?
C36 P1 Ru1 115.97(12) . . ?
C30 P1 Ru1 107.24(11) . . ?
C39 P2 C42 107.4(3) . . ?
C39 P2 C45 102.8(3) . . ?
C42 P2 C45 104.41(16) . . ?
C39 P2 Ru1 119.03(14) . . ?
C42 P2 Ru1 115.48(11) . . ?
C45 P2 Ru1 105.94(15) . . ?
C2 C1 Ru1 135.8(2) . . ?
C2 C1 H1 112.1 . . ?
Ru1 C1 H1 112.1 . . ?
C1 C2 C3 126.6(3) . . ?
C1 C2 H2 116.7 . . ?
C3 C2 H2 116.7 . . ?
C28 C3 C4 117.8(3) . . ?
C28 C3 C2 119.7(2) . . ?
C4 C3 C2 122.5(3) . . ?
C5 C4 C3 120.2(3) . . ?
C5 C4 H4 119.9 . . ?
C3 C4 H4 119.9 . . ?
C4 C5 C6 122.1(3) . . ?
C4 C5 H5 119.0 . . ?
C6 C5 H5 119.0 . . ?
C5 C6 C27 119.1(3) . . ?
C5 C6 C7 122.2(3) . . ?
C27 C6 C7 118.6(3) . . ?
C8 C7 C6 120.9(3) . . ?
C8 C7 H7 119.5 . . ?
C6 C7 H7 119.6 . . ?
C7 C8 C9 122.2(3) . . ?
C7 C8 H8 118.9 . . ?
C9 C8 H8 118.9 . . ?
C10 C9 C26 119.5(3) . . ?
C10 C9 C8 121.2(3) . . ?
C26 C9 C8 119.1(3) . . ?
C11 C10 C9 121.2(3) . . ?
C11 C10 H10 119.4 . . ?
C9 C10 H10 119.4 . . ?
C10 C11 C12 120.7(3) . . ?
C10 C11 H11 119.6 . . ?
C12 C11 H11 119.6 . . ?
C11 C12 C13 120.8(3) . . ?
C11 C12 C25 119.5(3) . . ?
C13 C12 C25 119.7(3) . . ?
C14 C13 C12 121.2(3) . . ?
C14 C13 H13 119.4 . . ?
C12 C13 H13 119.4 . . ?
C13 C14 C15 120.3(3) . . ?
C13 C14 H14 119.8 . . ?
C15 C14 H14 119.8 . . ?
C24 C15 C14 120.2(3) . . ?
C24 C15 C16 120.1(3) . . ?
C14 C15 C16 119.6(3) . . ?
C17 C16 C15 121.8(3) . . ?
C17 C16 H16 119.1 . . ?
C15 C16 H16 119.1 . . ?
C16 C17 C18 120.3(3) . . ?
C16 C17 H17 119.8 . . ?
C18 C17 H17 119.8 . . ?
C19 C18 C17 120.6(3) . . ?
C19 C18 C23 119.2(3) . . ?
C17 C18 C23 120.2(3) . . ?
C20 C19 C18 121.5(3) . . ?
C20 C19 H19 119.3 . . ?
C18 C19 H19 119.3 . . ?
C19 C20 C21 119.9(3) . . ?
C19 C20 H20 120.1 . . ?
C21 C20 H20 120.1 . . ?
C22 C21 C20 120.1(3) . . ?
C22 C21 H21 120.0 . . ?
C20 C21 H21 120.0 . . ?
C21 C22 C23 121.8(3) . . ?
C21 C22 H22 119.1 . . ?
C23 C22 H22 119.1 . . ?
C22 C23 C18 117.4(3) . . ?
C22 C23 C24 123.7(3) . . ?
C18 C23 C24 118.8(3) . . ?
C15 C24 C25 118.4(2) . . ?
C15 C24 C23 117.2(3) . . ?
C25 C24 C23 124.1(3) . . ?
C12 C25 C26 117.3(3) . . ?
C12 C25 C24 116.6(3) . . ?
C26 C25 C24 126.1(2) . . ?
C9 C26 C27 117.5(3) . . ?
C9 C26 C25 117.7(3) . . ?
C27 C26 C25 124.6(2) . . ?
C28 C27 C6 116.7(3) . . ?
C28 C27 C26 123.4(3) . . ?
C6 C27 C26 119.8(3) . . ?
C3 C28 C27 123.8(3) . . ?
C3 C28 H28 118.1 . . ?
C27 C28 H28 118.1 . . ?
O1 C29 Ru1 177.6(3) . . ?
C31 C30 C32 110.7(3) . . ?
C31 C30 P1 111.2(2) . . ?
C32 C30 P1 111.7(3) . . ?
C31 C30 H30 107.7 . . ?
C32 C30 H30 107.7 . . ?
P1 C30 H30 107.7 . . ?
C30 C31 H31A 109.5 . . ?
C30 C31 H31B 109.5 . . ?
H31A C31 H31B 109.5 . . ?
C30 C31 H31C 109.5 . . ?
H31A C31 H31C 109.5 . . ?
H31B C31 H31C 109.5 . . ?
C30 C32 H32A 109.5 . . ?
C30 C32 H32B 109.5 . . ?
H32A C32 H32B 109.5 . . ?
C30 C32 H32C 109.5 . . ?
H32A C32 H32C 109.5 . . ?
H32B C32 H32C 109.5 . . ?
C35 C33 C34 110.3(3) . . ?
C35 C33 P1 113.5(3) . . ?
C34 C33 P1 117.7(3) . . ?
C35 C33 H33 104.7 . . ?
C34 C33 H33 104.7 . . ?
P1 C33 H33 104.7 . . ?
C33 C34 H34A 109.5 . . ?
C33 C34 H34B 109.5 . . ?
H34A C34 H34B 109.5 . . ?
C33 C34 H34C 109.5 . . ?
H34A C34 H34C 109.5 . . ?
H34B C34 H34C 109.5 . . ?
C33 C35 H35A 109.5 . . ?
C33 C35 H35B 109.5 . . ?
H35A C35 H35B 109.5 . . ?
C33 C35 H35C 109.5 . . ?
H35A C35 H35C 109.5 . . ?
H35B C35 H35C 109.5 . . ?
C38 C36 C37 110.0(3) . . ?
C38 C36 P1 113.1(2) . . ?
C37 C36 P1 116.0(3) . . ?
C38 C36 H36 105.6 . . ?
C37 C36 H36 105.6 . . ?
P1 C36 H36 105.6 . . ?
C36 C37 H37A 109.5 . . ?
C36 C37 H37B 109.5 . . ?
H37A C37 H37B 109.5 . . ?
C36 C37 H37C 109.5 . . ?
H37A C37 H37C 109.5 . . ?
H37B C37 H37C 109.5 . . ?
C36 C38 H38A 109.5 . . ?
C36 C38 H38B 109.5 . . ?
H38A C38 H38B 109.5 . . ?
C36 C38 H38C 109.5 . . ?
H38A C38 H38C 109.5 . . ?
H38B C38 H38C 109.5 . . ?
C40 C39 C41 117.0(4) . . ?
C40 C39 P2 125.4(3) . . ?
C41 C39 P2 117.4(3) . . ?
C40 C39 H39 91.7 . . ?
C41 C39 H39 91.7 . . ?
P2 C39 H39 91.7 . . ?
C39 C40 H40A 109.5 . . ?
C39 C40 H40B 109.5 . . ?
H40A C40 H40B 109.5 . . ?
C39 C40 H40C 109.5 . . ?
H40A C40 H40C 109.5 . . ?
H40B C40 H40C 109.5 . . ?
C39 C41 H41A 109.5 . . ?
C39 C41 H41B 109.5 . . ?
H41A C41 H41B 109.5 . . ?
C39 C41 H41C 109.5 . . ?
H41A C41 H41C 109.5 . . ?
H41B C41 H41C 109.5 . . ?
C43 C42 C44 109.9(3) . . ?
C43 C42 P2 112.4(2) . . ?
C44 C42 P2 116.2(3) . . ?
C43 C42 H42 105.8 . . ?
C44 C42 H42 105.8 . . ?
P2 C42 H42 105.8 . . ?
C42 C43 H43A 109.5 . . ?
C42 C43 H43B 109.5 . . ?
H43A C43 H43B 109.5 . . ?
C42 C43 H43C 109.5 . . ?
H43A C43 H43C 109.5 . . ?
H43B C43 H43C 109.5 . . ?
C42 C44 H44A 109.5 . . ?
C42 C44 H44B 109.5 . . ?
H44A C44 H44B 109.5 . . ?
C42 C44 H44C 109.5 . . ?
H44A C44 H44C 109.5 . . ?
H44B C44 H44C 109.5 . . ?
C46 C45 C47 110.3(5) . . ?
C46 C45 P2 113.7(3) . . ?
C47 C45 P2 109.6(3) . . ?
C46 C45 H45 107.7 . . ?
C47 C45 H45 107.7 . . ?
P2 C45 H45 107.7 . . ?
C45 C46 H46A 109.5 . . ?
C45 C46 H46B 109.5 . . ?
H46A C46 H46B 109.5 . . ?
C45 C46 H46C 109.5 . . ?
H46A C46 H46C 109.5 . . ?
H46B C46 H46C 109.5 . . ?
C45 C47 H47A 109.5 . . ?
C45 C47 H47B 109.5 . . ?
H47A C47 H47B 109.5 . . ?
C45 C47 H47C 109.5 . . ?
H47A C47 H47C 109.5 . . ?
H47B C47 H47C 109.5 . . ?

loop_
 _geom_torsion_atom_site_label_1
 _geom_torsion_atom_site_label_2
 _geom_torsion_atom_site_label_3
 _geom_torsion_atom_site_label_4
 _geom_torsion
 _geom_torsion_site_symmetry_1
 _geom_torsion_site_symmetry_2
 _geom_torsion_site_symmetry_3
 _geom_torsion_site_symmetry_4
 _geom_torsion_publ_flag
C29 Ru1 P1 C33 157.67(15) . . . . ?
C1 Ru1 P1 C33 66.31(14) . . . . ?
P2 Ru1 P1 C33 -101.77(18) . . . . ?
Cl1 Ru1 P1 C33 -28.07(12) . . . . ?
C29 Ru1 P1 C36 26.42(15) . . . . ?
C1 Ru1 P1 C36 -64.95(14) . . . . ?
P2 Ru1 P1 C36 126.97(17) . . . . ?
Cl1 Ru1 P1 C36 -159.32(12) . . . . ?
C29 Ru1 P1 C30 -87.84(15) . . . . ?
C1 Ru1 P1 C30 -179.21(14) . . . . ?
P2 Ru1 P1 C30 12.7(2) . . . . ?
Cl1 Ru1 P1 C30 86.42(12) . . . . ?
C29 Ru1 P2 C39 -21.6(3) . . . . ?
C1 Ru1 P2 C39 70.2(3) . . . . ?
P1 Ru1 P2 C39 -121.7(3) . . . . ?
Cl1 Ru1 P2 C39 164.6(3) . . . . ?
C29 Ru1 P2 C42 -151.61(17) . . . . ?
C1 Ru1 P2 C42 -59.77(16) . . . . ?
P1 Ru1 P2 C42 108.31(19) . . . . ?
Cl1 Ru1 P2 C42 34.54(14) . . . . ?
C29 Ru1 P2 C45 93.37(16) . . . . ?
C1 Ru1 P2 C45 -174.79(15) . . . . ?
P1 Ru1 P2 C45 -6.7(2) . . . . ?
Cl1 Ru1 P2 C45 -80.47(13) . . . . ?
C29 Ru1 C1 C2 9.7(3) . . . . ?
P1 Ru1 C1 C2 98.6(3) . . . . ?
P2 Ru1 C1 C2 -83.9(3) . . . . ?
Cl1 Ru1 C1 C2 -172.3(3) . . . . ?
Ru1 C1 C2 C3 -176.4(2) . . . . ?
C1 C2 C3 C28 -171.7(3) . . . . ?
C1 C2 C3 C4 11.4(5) . . . . ?
C28 C3 C4 C5 -3.3(4) . . . . ?
C2 C3 C4 C5 173.6(3) . . . . ?
C3 C4 C5 C6 0.3(4) . . . . ?
C4 C5 C6 C27 4.9(4) . . . . ?
C4 C5 C6 C7 -170.8(3) . . . . ?
C5 C6 C7 C8 171.9(3) . . . . ?
C27 C6 C7 C8 -3.8(5) . . . . ?
C6 C7 C8 C9 5.2(5) . . . . ?
C7 C8 C9 C10 -172.6(4) . . . . ?
C7 C8 C9 C26 4.1(5) . . . . ?
C26 C9 C10 C11 -4.3(5) . . . . ?
C8 C9 C10 C11 172.5(3) . . . . ?
C9 C10 C11 C12 10.3(6) . . . . ?
C10 C11 C12 C13 -179.2(3) . . . . ?
C10 C11 C12 C25 1.1(5) . . . . ?
C11 C12 C13 C14 -178.2(3) . . . . ?
C25 C12 C13 C14 1.6(5) . . . . ?
C12 C13 C14 C15 9.5(5) . . . . ?
C13 C14 C15 C24 -4.4(5) . . . . ?
C13 C14 C15 C16 173.0(3) . . . . ?
C24 C15 C16 C17 5.7(5) . . . . ?
C14 C15 C16 C17 -171.7(3) . . . . ?
C15 C16 C17 C18 3.9(5) . . . . ?
C16 C17 C18 C19 172.2(3) . . . . ?
C16 C17 C18 C23 -4.5(5) . . . . ?
C17 C18 C19 C20 -173.8(3) . . . . ?
C23 C18 C19 C20 2.9(5) . . . . ?
C18 C19 C20 C21 1.4(6) . . . . ?
C19 C20 C21 C22 -2.9(5) . . . . ?
C20 C21 C22 C23 0.1(5) . . . . ?
C21 C22 C23 C18 4.1(5) . . . . ?
C21 C22 C23 C24 179.1(3) . . . . ?
C19 C18 C23 C22 -5.5(4) . . . . ?
C17 C18 C23 C22 171.3(3) . . . . ?
C19 C18 C23 C24 179.2(3) . . . . ?
C17 C18 C23 C24 -4.0(5) . . . . ?
C14 C15 C24 C25 -11.3(4) . . . . ?
C16 C15 C24 C25 171.3(3) . . . . ?
C14 C15 C24 C23 163.6(3) . . . . ?
C16 C15 C24 C23 -13.8(4) . . . . ?
C22 C23 C24 C15 -162.0(3) . . . . ?
C18 C23 C24 C15 12.9(4) . . . . ?
C22 C23 C24 C25 12.6(5) . . . . ?
C18 C23 C24 C25 -172.5(3) . . . . ?
C11 C12 C25 C26 -17.7(4) . . . . ?
C13 C12 C25 C26 162.6(3) . . . . ?
C11 C12 C25 C24 162.9(3) . . . . ?
C13 C12 C25 C24 -16.8(4) . . . . ?
C15 C24 C25 C12 21.5(4) . . . . ?
C23 C24 C25 C12 -153.1(3) . . . . ?
C15 C24 C25 C26 -157.9(3) . . . . ?
C23 C24 C25 C26 27.6(5) . . . . ?
C10 C9 C26 C27 162.7(3) . . . . ?
C8 C9 C26 C27 -14.2(5) . . . . ?
C10 C9 C26 C25 -12.6(5) . . . . ?
C8 C9 C26 C25 170.6(3) . . . . ?
C12 C25 C26 C9 23.1(4) . . . . ?
C24 C25 C26 C9 -157.5(3) . . . . ?
C12 C25 C26 C27 -151.8(3) . . . . ?
C24 C25 C26 C27 27.6(5) . . . . ?
C5 C6 C27 C28 -6.8(4) . . . . ?
C7 C6 C27 C28 169.0(3) . . . . ?
C5 C6 C27 C26 177.5(3) . . . . ?
C7 C6 C27 C26 -6.6(4) . . . . ?
C9 C26 C27 C28 -160.0(3) . . . . ?
C25 C26 C27 C28 14.9(4) . . . . ?
C9 C26 C27 C6 15.4(4) . . . . ?
C25 C26 C27 C6 -169.7(3) . . . . ?
C4 C3 C28 C27 1.0(4) . . . . ?
C2 C3 C28 C27 -176.0(3) . . . . ?
C6 C27 C28 C3 4.0(4) . . . . ?
C26 C27 C28 C3 179.5(3) . . . . ?
C1 Ru1 C29 O1 102(8) . . . . ?
P1 Ru1 C29 O1 6(8) . . . . ?
P2 Ru1 C29 O1 -162(8) . . . . ?
Cl1 Ru1 C29 O1 -59(8) . . . . ?
C33 P1 C30 C31 64.5(3) . . . . ?
C36 P1 C30 C31 179.3(3) . . . . ?
Ru1 P1 C30 C31 -58.0(3) . . . . ?
C33 P1 C30 C32 -171.3(3) . . . . ?
C36 P1 C30 C32 -56.5(3) . . . . ?
Ru1 P1 C30 C32 66.2(3) . . . . ?
C36 P1 C33 C35 71.6(3) . . . . ?
C30 P1 C33 C35 -179.1(3) . . . . ?
Ru1 P1 C33 C35 -62.4(3) . . . . ?
C36 P1 C33 C34 -59.3(3) . . . . ?
C30 P1 C33 C34 50.0(3) . . . . ?
Ru1 P1 C33 C34 166.7(2) . . . . ?
C33 P1 C36 C38 -68.3(3) . . . . ?
C30 P1 C36 C38 -177.9(3) . . . . ?
Ru1 P1 C36 C38 65.4(3) . . . . ?
C33 P1 C36 C37 60.2(3) . . . . ?
C30 P1 C36 C37 -49.3(3) . . . . ?
Ru1 P1 C36 C37 -166.0(3) . . . . ?
C42 P2 C39 C40 118.9(7) . . . . ?
C45 P2 C39 C40 -131.3(7) . . . . ?
Ru1 P2 C39 C40 -14.7(9) . . . . ?
C42 P2 C39 C41 -67.3(6) . . . . ?
C45 P2 C39 C41 42.5(6) . . . . ?
Ru1 P2 C39 C41 159.1(4) . . . . ?
C39 P2 C42 C43 -69.5(3) . . . . ?
C45 P2 C42 C43 -178.1(3) . . . . ?
Ru1 P2 C42 C43 66.0(3) . . . . ?
C39 P2 C42 C44 58.4(4) . . . . ?
C45 P2 C42 C44 -50.3(4) . . . . ?
Ru1 P2 C42 C44 -166.2(3) . . . . ?
C39 P2 C45 C46 -164.7(4) . . . . ?
C42 P2 C45 C46 -52.7(4) . . . . ?
Ru1 P2 C45 C46 69.7(3) . . . . ?
C39 P2 C45 C47 71.4(4) . . . . ?
C42 P2 C45 C47 -176.6(4) . . . . ?
Ru1 P2 C45 C47 -54.2(4) . . . . ?

_diffrn_measured_fraction_theta_max    0.986
_diffrn_reflns_theta_full              27.00
_diffrn_measured_fraction_theta_full   0.986
_refine_diff_density_max    0.862
_refine_diff_density_min   -0.646
_refine_diff_density_rms    0.121
